# Supplementary material
Source: PubMed Central journal article supplement (PMC6486665)

Figure 3C

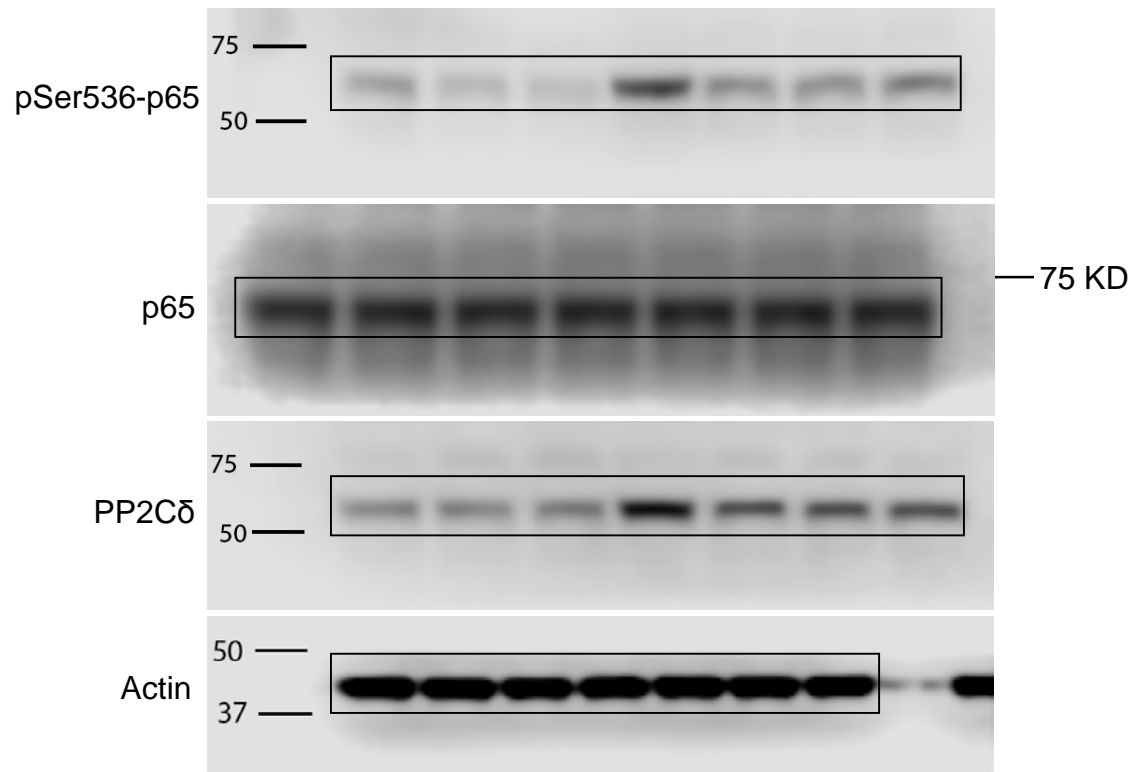

Figure 3D

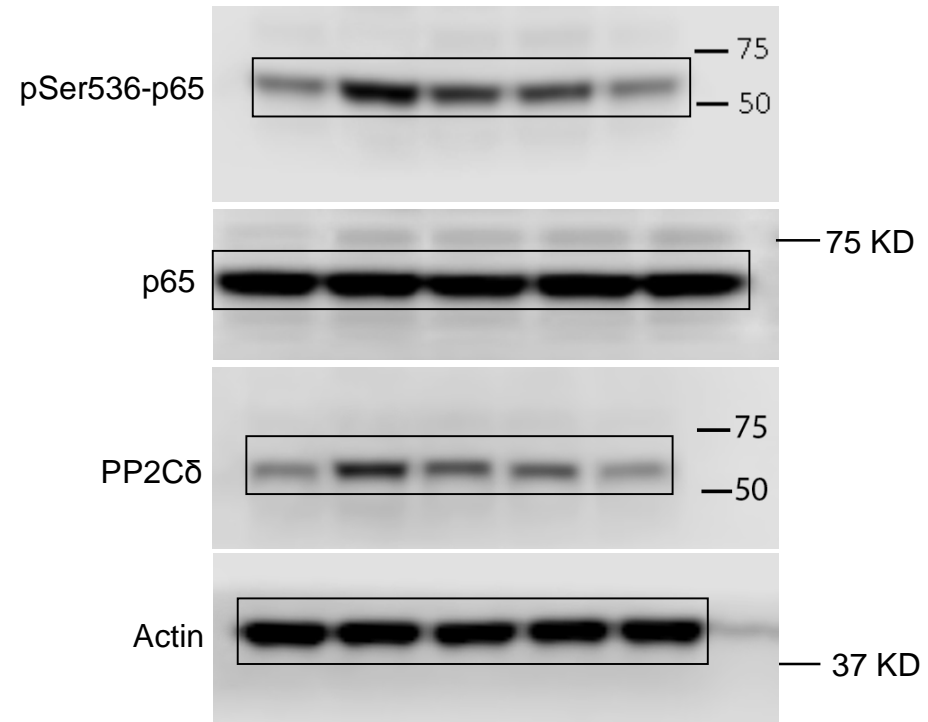

Figure S9. Uncropped western blots for data shown in Figure 3

Supplement: Supp_Fig9.pdf [file Supp_Fig9.pdf]
